# Supplementary material for: Association of Dio2 Thr92ala Polymorphism With Pediatric Obesity in Japanese Children: A Case Control Study
Source: Research Square preprint supplement (doi:10.21203/rs.3.rs-131507/v1), 2020-12-30
Supplement: Supplementary file 1 [file fa771a9def7f065b901f379c.docx]

Table 2. Clinical characteristics in the non-obese and obese children group, classified based on the Rohrer’s index

Data are presented as medians (P25-P75) and n. NOB, non-obese children group; OB, obese children group; BMI, body mass index; TC, total cholesterol; HDLC, high-density lipoprotein cholesterol; LDLC, low-density lipoprotein cholesterol; TG, triglyceride; RBG, random blood glucose; HbA1c, hemoglobin A1c. a n = 263, bn = 235, cn = 90, dn = 86, en = 85
